# Supplementary material for: Structural features and in vitro antitumor activity of a water-extracted polysaccharide from Ganoderma applanatum
Source: Royal Society of Chemistry journal article supplement (doi:10.1039/d3nj01903a), 2023-01-01
Supplement: d3nj01903a1.pdf [file d3nj01903a1.pdf]

## SUPPORTING INFORMATION

### **Structural features and *in vitro* antitumor activity of a water-extracted polysaccharide from *Ganoderma applanatum***

Zan Gong<sup>a</sup>, Meng Liu<sup>a</sup>, Hui Liu<sup>a</sup>, Zhiwei Deng<sup>a</sup>, Xiangxiang Qin<sup>a</sup>, Jing Nie<sup>a</sup>,

Zhe Qiao<sup>a</sup>, Hua Zhu<sup>b\*</sup>, Shian Zhong<sup>a,c\*</sup>

<sup>a</sup>College of Chemistry and Chemical Engineering, Central South University,  
Changsha 410083, China

<sup>b</sup>GuangXi University of Chinese Medicine, Nanning 530200, China

<sup>c</sup>Changsha Medical University, Changsha 410083, China

\*Corresponding author:

College of Chemistry and Chemical Engineering, Central South University, Changsha,  
Hunan, 410083, China

Tel: +86 0731 88879616; Fax: +86 0731 88879616;

E-mail: [zhongshian@aliyun.com](mailto:zhongshian@aliyun.com) (Shian Zhong)

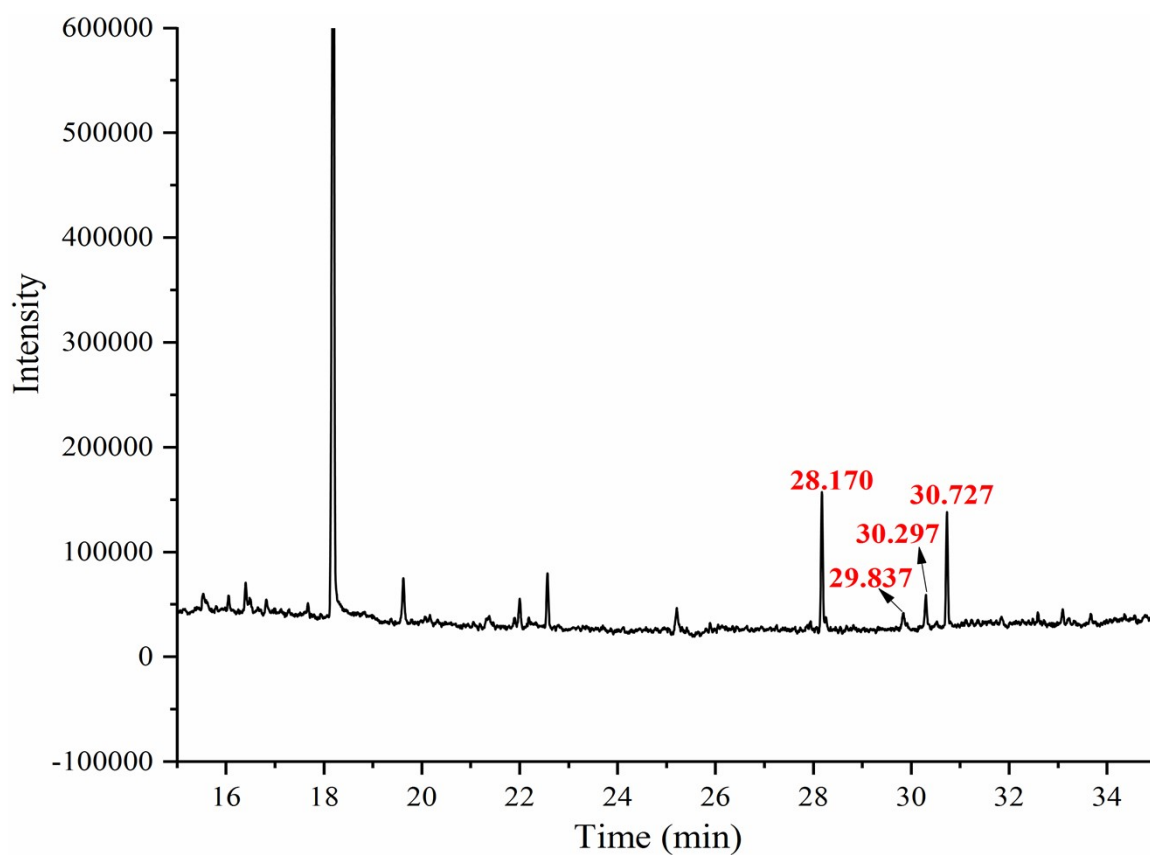

**Fig. S1 Total ion chromatogram of derivatized GAP-2.**

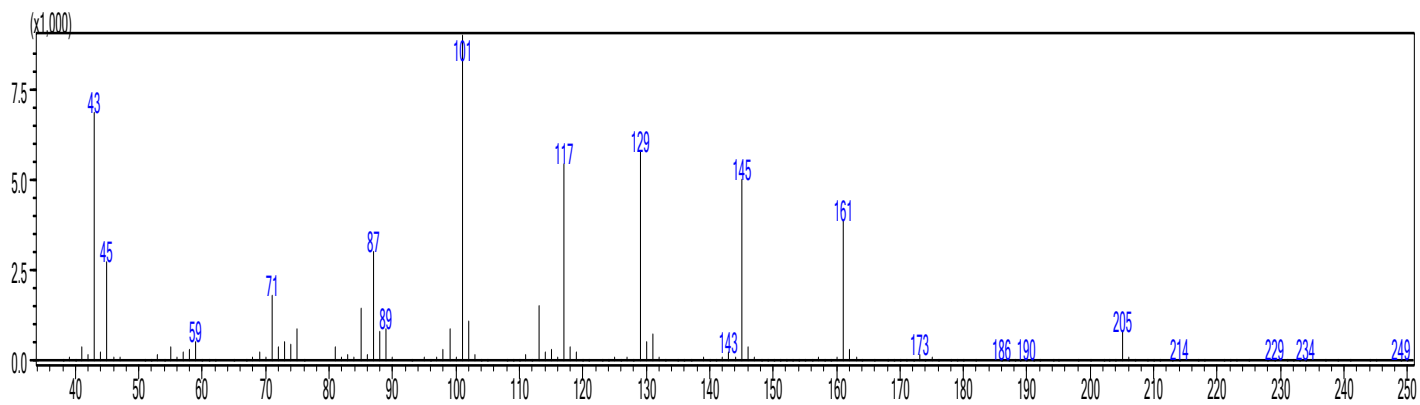

**Fig. S2 Mass spectrum with the retention time of 28.170.**

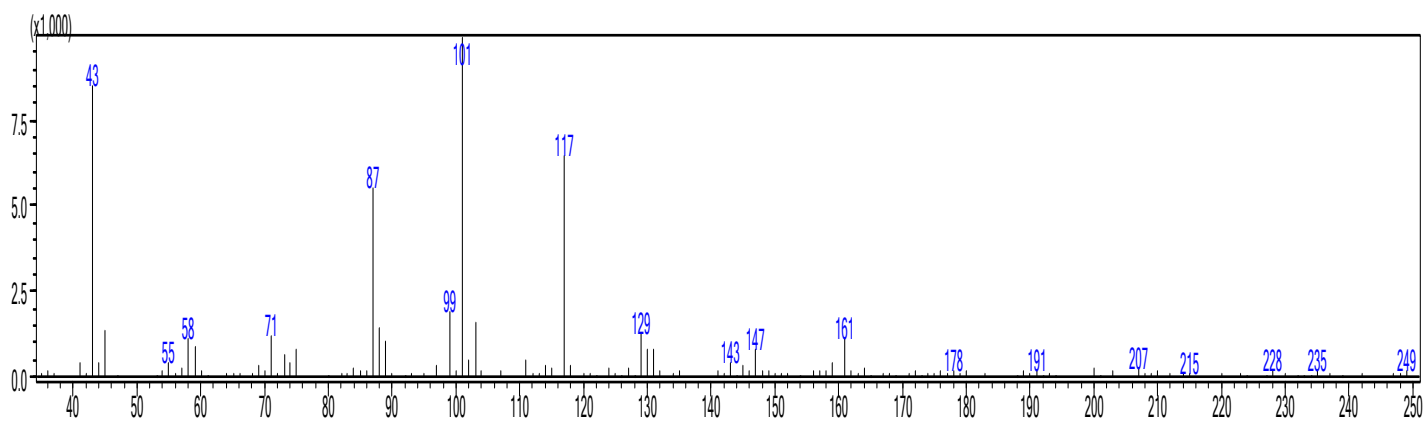

**Fig. S3 Mass spectrum with the retention time of 29.837.**

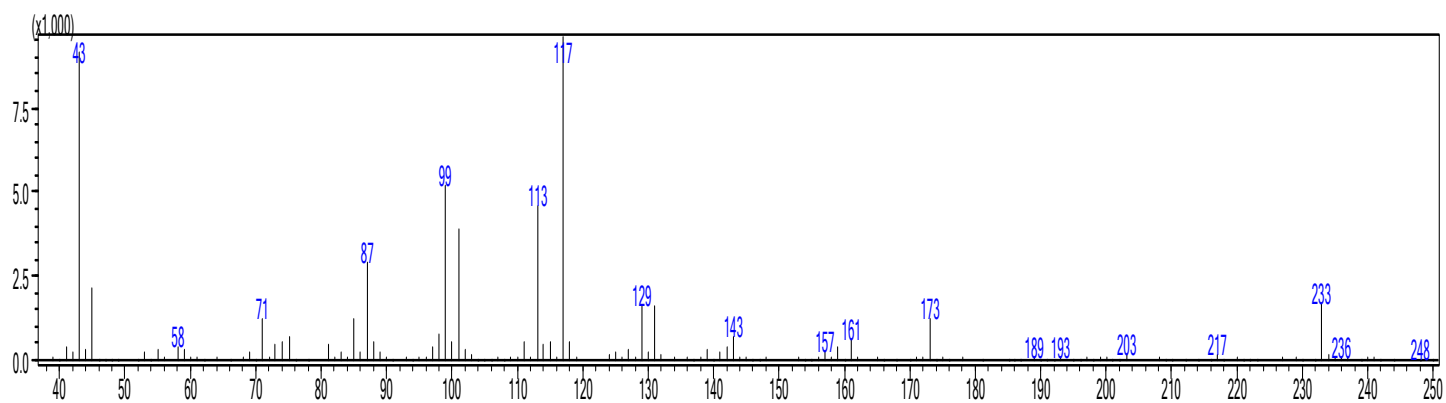

**Fig. S4 Mass spectrum with the retention time of 30.297.**

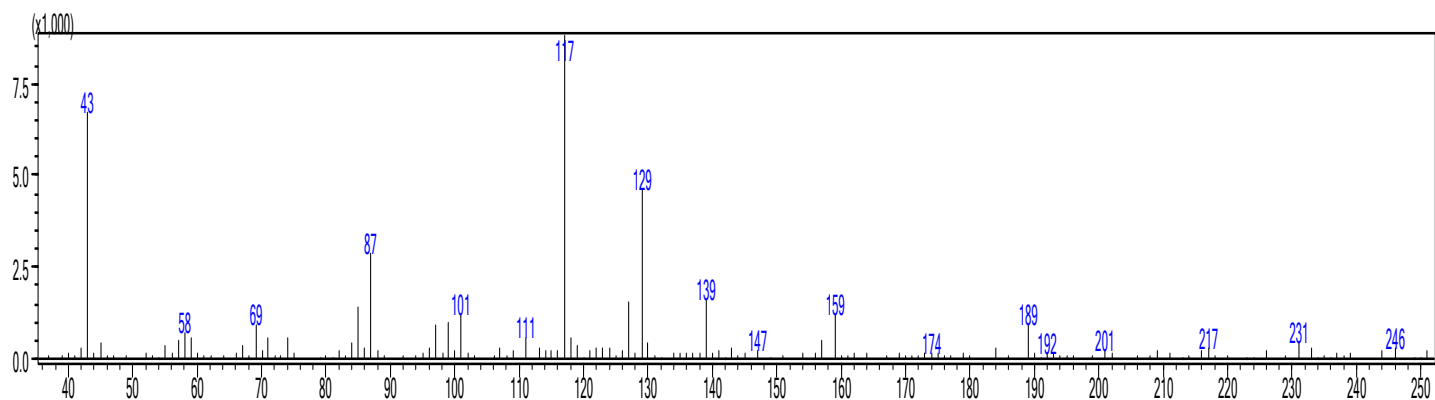

**Fig. S5 Mass spectrum with the retention time of 30.727.**

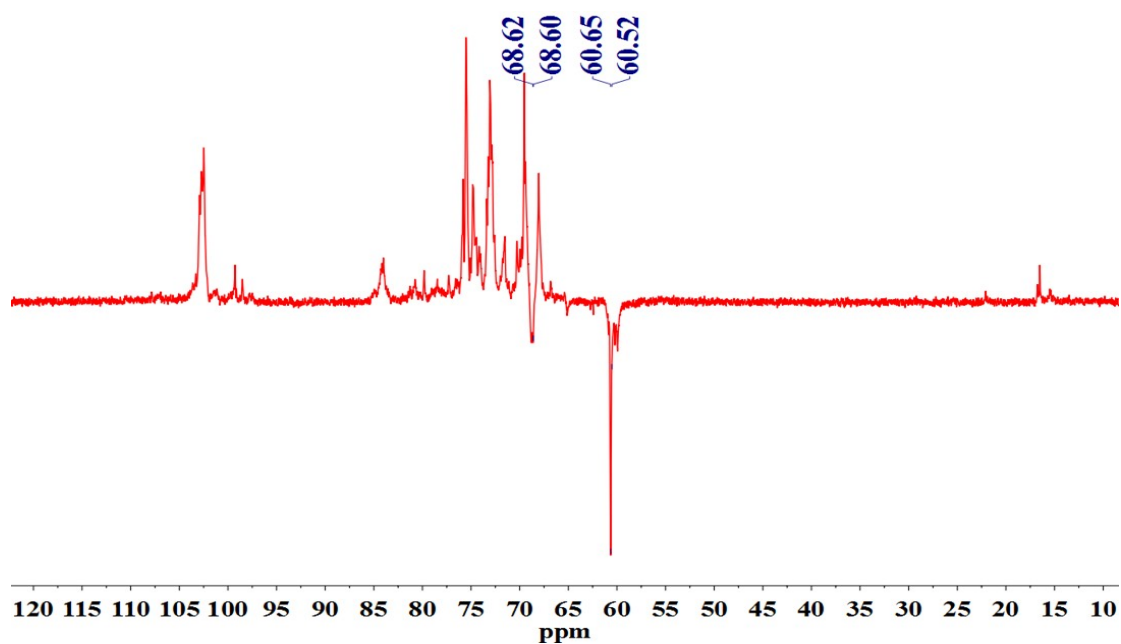

**Fig. S6 DEPT-135 spectrum of GAP-2.**
